# Supplementary material
Source: Springer Nature journal article supplement (https://www.springermedizin.de/resource/supplementary/12935_2012_336_MOESM5_ESM.pdf/9540430)

**A**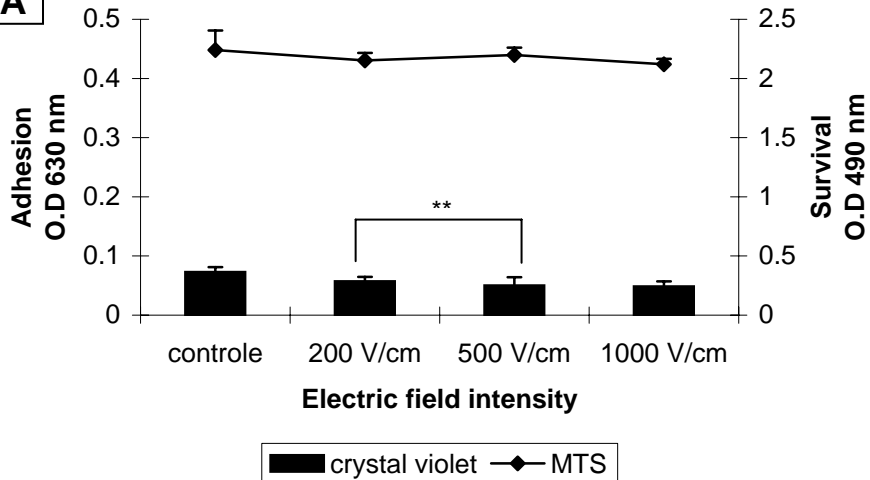**B**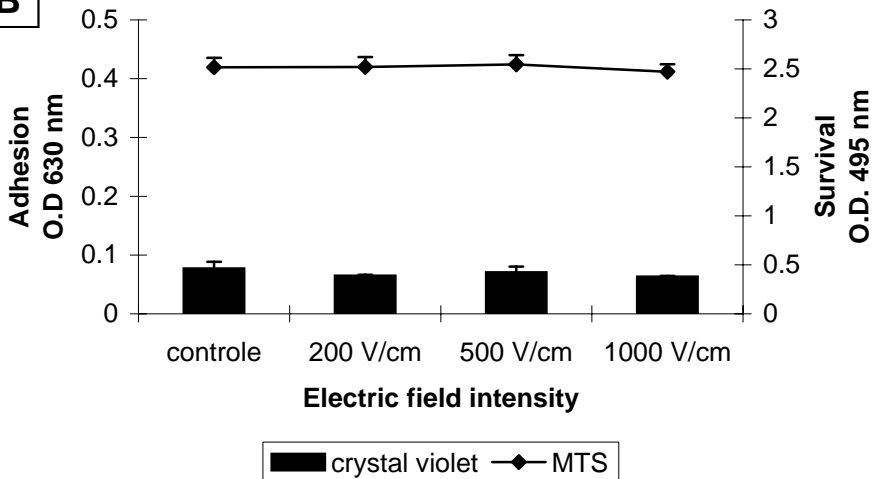

Supplement: MOESM5 [file 9540430]
